# Supplementary material for: Vitamin D in the Middle East and North Africa
Source: PubMed Central journal article supplement — Bone Rep. 2018 Mar 17;8:135–46. doi: 10.1016/j.bonr.2018.03.004 (PMC6020111; doi:10.1016/j.bonr.2018.03.004), 2018-03-17
Supplement: mmc4.pdf [file mmc4.pdf]

## **Multiple files are bound together in this PDF Package.**

Adobe recommends using Adobe Reader or Adobe Acrobat version 8 or later to work with documents contained within a PDF Package. By updating to the latest version, you'll enjoy the following benefits:

- Efficient, integrated PDF viewing
- Easy printing
- Quick searches

**Don't have the latest version of Adobe Reader?**

**[Click here to download the latest version of Adobe Reader](#)**

**If you already have Adobe Reader 8,  
click a file in this PDF Package to view it.**
